# Supplementary material for: Transition Metal (Fe, Co, Ni) Nanoparticles on Selective Amino-N-Doped Carbon as High-Performance Oxygen Reduction Reaction Electrocatalyst
Source: MDPI journal article supplement (doi:10.3390/nano9050742), 2019-05-14
Supplement: s1 [file s1]

Supplementary data:

# Transition Metal (Fe, Co, Ni) Nanoparticles on Selective Amino-N-Doped Carbon as High-Performance Oxygen Reduction Reaction Electrocatalyst

Seonghee Kim <sup>1</sup>, Shuhei Kato <sup>2</sup>, Takahiro Ishizaki <sup>2</sup>, Oi Lun Li <sup>1,\*</sup> and Jun Kang <sup>3,\*</sup>

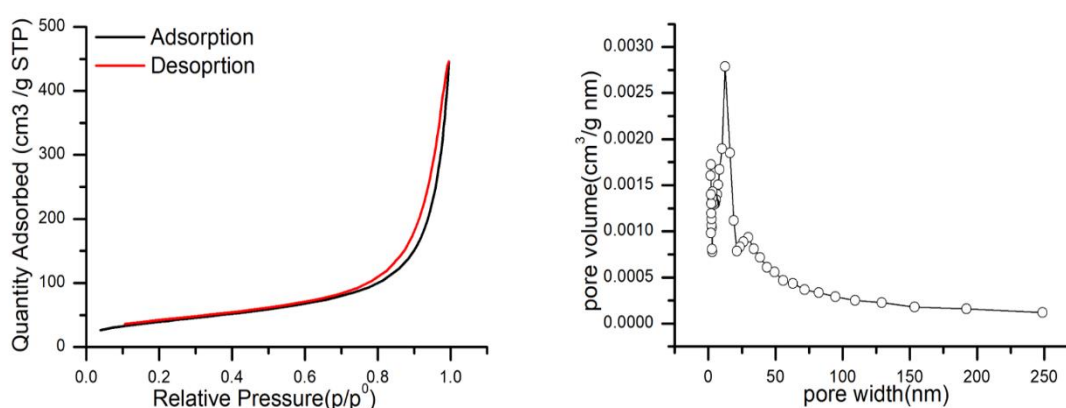

**Figure S1.** BET adsorption-desorption of Fe-N/C, (a) Isotherm linear adsorption-desorption plot of Fe-N/C, (b) BJH adsorption pore size distribution.
